# Supplementary material for: A fluorescent sensor for intracellular Zn2+ based on cylindrical molecular brushes of poly(2-oxazoline) through ion-induced emission
Source: Royal Society of Chemistry journal article supplement (doi:10.1039/d0py01054e), 2020-01-01
Supplement: d0py01054e1.pdf [file d0py01054e1.pdf]

***Supporting Information for:***

**Fluorescent Sensor for Intracellular Zn<sup>2+</sup> by Cylindrical  
Molecular Brushes of Poly(2-oxazoline) through Ion-  
Induced Emission**

Shanshan Chen,<sup>a, b</sup> Tingting Sun,<sup>d</sup> Zhigang Xie,<sup>d</sup> Dewen Dong,<sup>\*, a, b</sup> and

Ning Zhang,<sup>\*, a, c</sup>

<sup>a</sup> CAS Key Laboratory of High-Performance Synthetic Rubber and its Composite Materials, Changchun Institute of Applied Chemistry, Chinese Academy of Sciences, Changchun 130022, China

<sup>b</sup> University of Science and Technology of China, Hefei 230026, China

<sup>c</sup> Department of Chemistry, Northeast Normal University, 5268 Renmin Street, Changchun 130024, China

<sup>d</sup> State Key Laboratory of Polymer Physics and Chemistry, Changchun Institute of Applied Chemistry, Chinese Academy of Sciences, Changchun 130022, China

Corresponds to: ning.zhang@ciac.ac.cn; zhangn380@nenu.edu.cn;  
dwdong@ciac.ac.cn

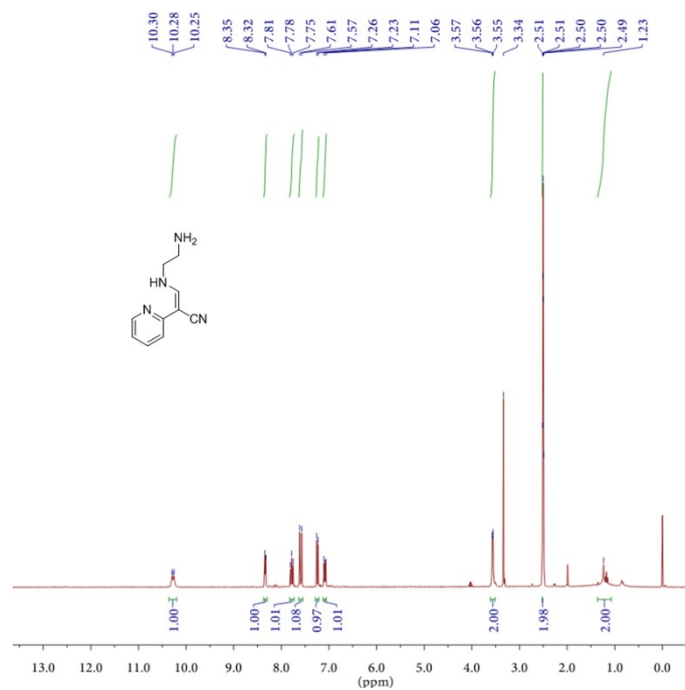

**Fig. S1 (A)**  $^1\text{H}$  NMR of enaminitrile molecule PAN-1.

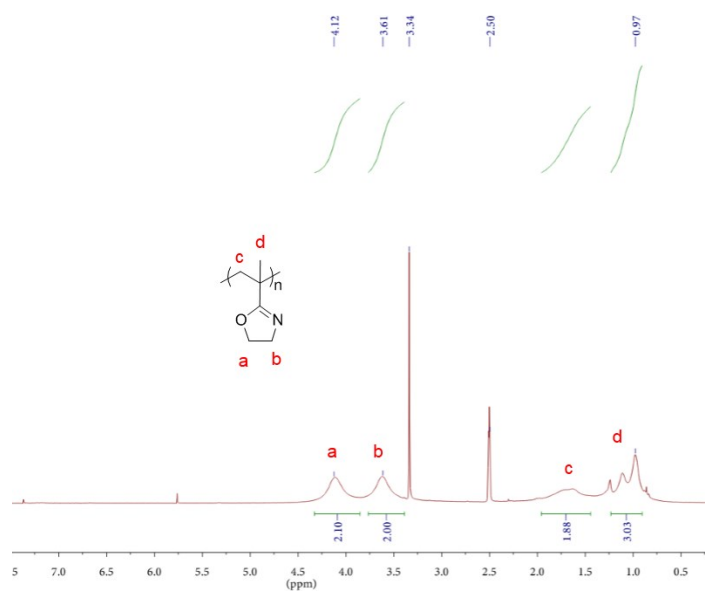

**Fig. S1 (B)**  $^1\text{H}$  NMR of P(IPOx)<sub>n</sub>.

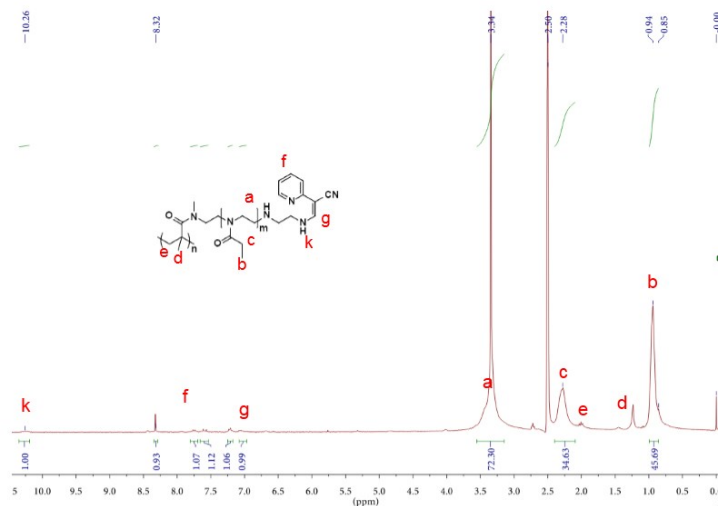

**Fig. S1 (C)** <sup>1</sup>H NMR of P(IPOx-g-EtOx).

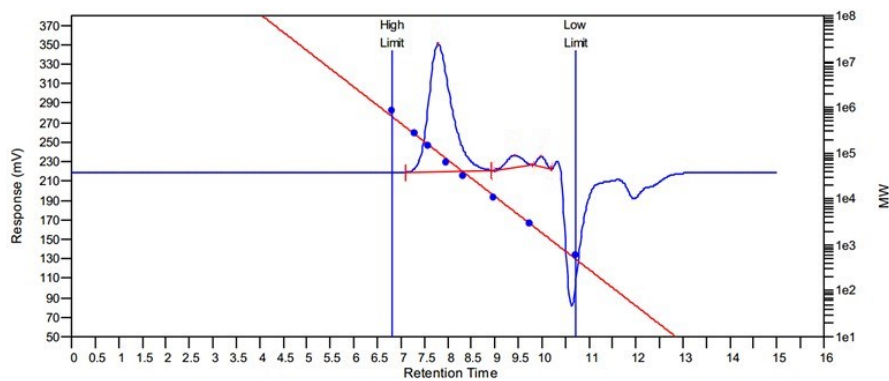

**Fig. S1 (D)** GPC of molecular brush P(IPOx-g-EtOx).

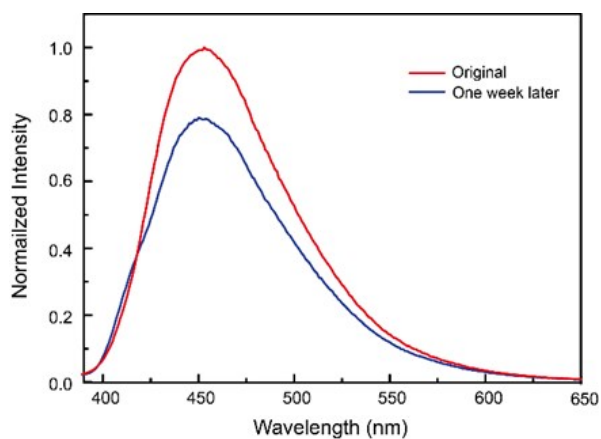

**Fig. S2** Fluorescence spectra of P(IPOx-g-EtOx) (2 mg/mL) aqueous solution containing Zn<sup>2+</sup> (100 μM) ions before and after exposure to sun light for one week. Excitation wavelength was kept at 365 nm.

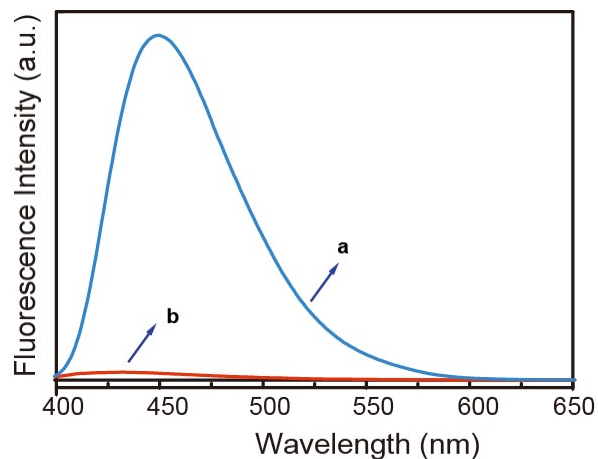

**Fig. S3** Fluorescence spectra of the molecular brush of poly(2-oxazoline) end-capping with PAN-1 (a) and without enaminitrile species (b) toward  $Zn^{2+}$ .

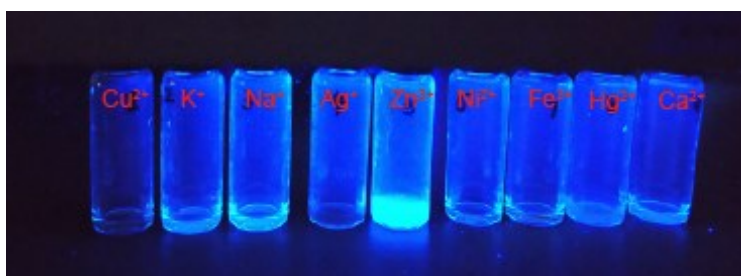

**Fig. S4** Visual color change of the solution of molecule PAN-1 observed with addition of different metal ions under UV light ( $\lambda = 365$  nm).

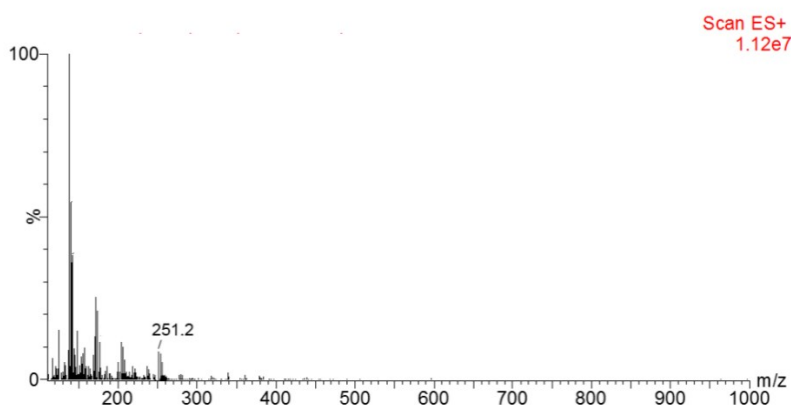

**Fig. S5** Mass spectrum of PAN-1 with  $Zn^{2+}$ .

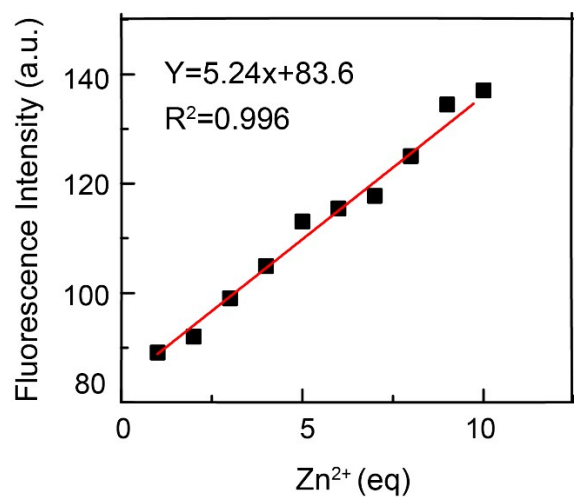

**Fig. S6** The calibration plots of P(IPOx-g-EtOx) (LOD can be calculated by  $3 \sigma/k$ ,  $\text{LOD}=3 \sigma/k=3 \times 1.55 \times 10^{-5}/5.24=8.9 \mu\text{M}$ ).

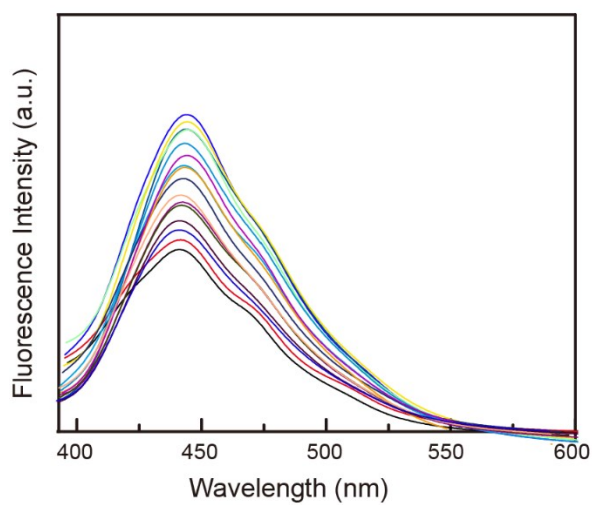

**Fig. S7** Fluorescence emission spectra of P(IPOx-g-EtOx) (1 mg/mL) aqueous solution upon successive addition of Zn<sup>2+</sup> (0–50  $\mu\text{M}$ ).

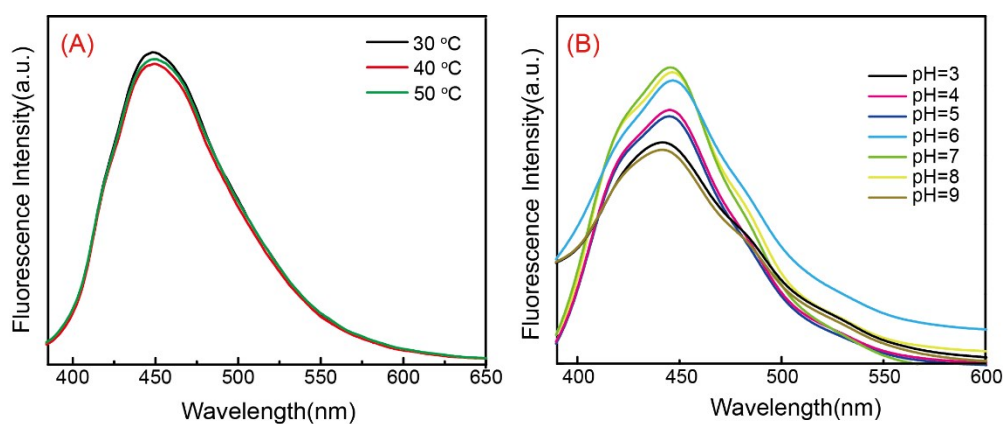

**Fig. S8** (A) Fluorescence intensity variation for P(IPOx-g-EtOx) (2 mg/mL) aqueous solution containing Zn<sup>2+</sup> (100 μM) ions at different temperature. (B) Fluorescence intensity variation for P(IPOx-g-EtOx) (2 mg/mL) aqueous solution containing Zn<sup>2+</sup> (100 μM) ions at different pH values. Excitation at 365 nm.

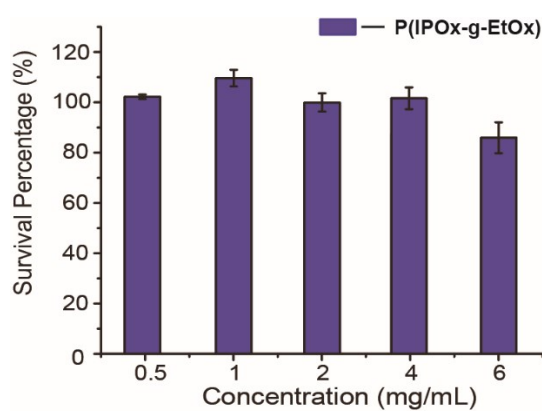

**Fig. S9** Viabilities of HeLa cells incubated with P(IPOx-g-EtOx) for 48 h at 37 °C, respectively. All the results were repeated three times and presented as mean ± SD.
